# Supplementary material
Source: Royal Society of Chemistry journal article supplement (doi:10.1039/d6tb00652c)
Supplement: d6tb00652c1.pdf [file d6tb00652c1.pdf]

1 **Supplementary Information**

2

3 **Molecularly Designed Star-Shaped PLA-Based Polymer with Enhanced**  
4 **Piezoelectricity for Ultrasound-Driven Wound Healing**

5 Guyue Liu,<sup>†a</sup> Jing Ma,<sup>†b</sup> Wei Liu,<sup>a</sup> Jingzhou Fang,<sup>a</sup> Qianhe Sun,<sup>a</sup> Meng Cui,<sup>\*a</sup> Xue Li<sup>\*\*b</sup> and  
6 Xiuqin Zhang<sup>\*a</sup>

7

8 <sup>a</sup> School of Materials Design and Engineering, Beijing Institute of Fashion Technology, Beijing  
9 100029, China.

10 <sup>b</sup> Key Laboratory of Molecular Nanostructure and Nanotechnology, Institute of Chemistry,  
11 Chinese Academy of Sciences, Beijing 100190, China.

12 <sup>†</sup> Guyue Liu and Jing Ma have contributed equally to the work.

13 <sup>\*</sup> Corresponding author

14 E-mail address: Meng Cui (cuimeng@bift.edu.cn); Xue Li (lixue01@iccas.ac.cn); Xiuqin Zhang  
15 (clyzxq@bift.edu.cn).

16

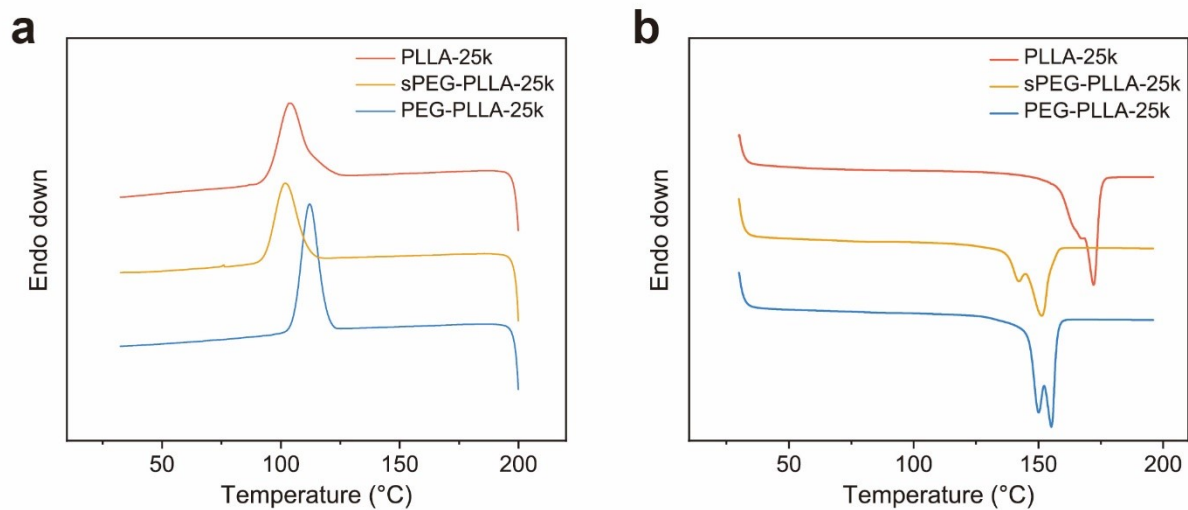

17

18 **Fig. S1** (a) DSC primary cooling curves of the polymers. (b) DSC secondary heating curves of  
 19 the polymers.

20

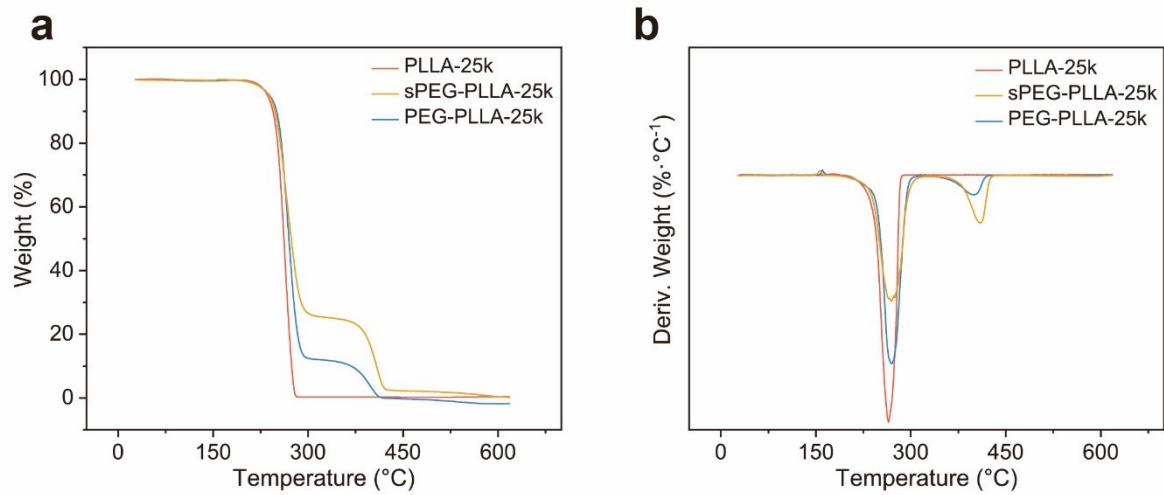

21

22 **Fig. S2** (a) TG curves of the polymers. (b) DTG curves of the polymers.

23

24

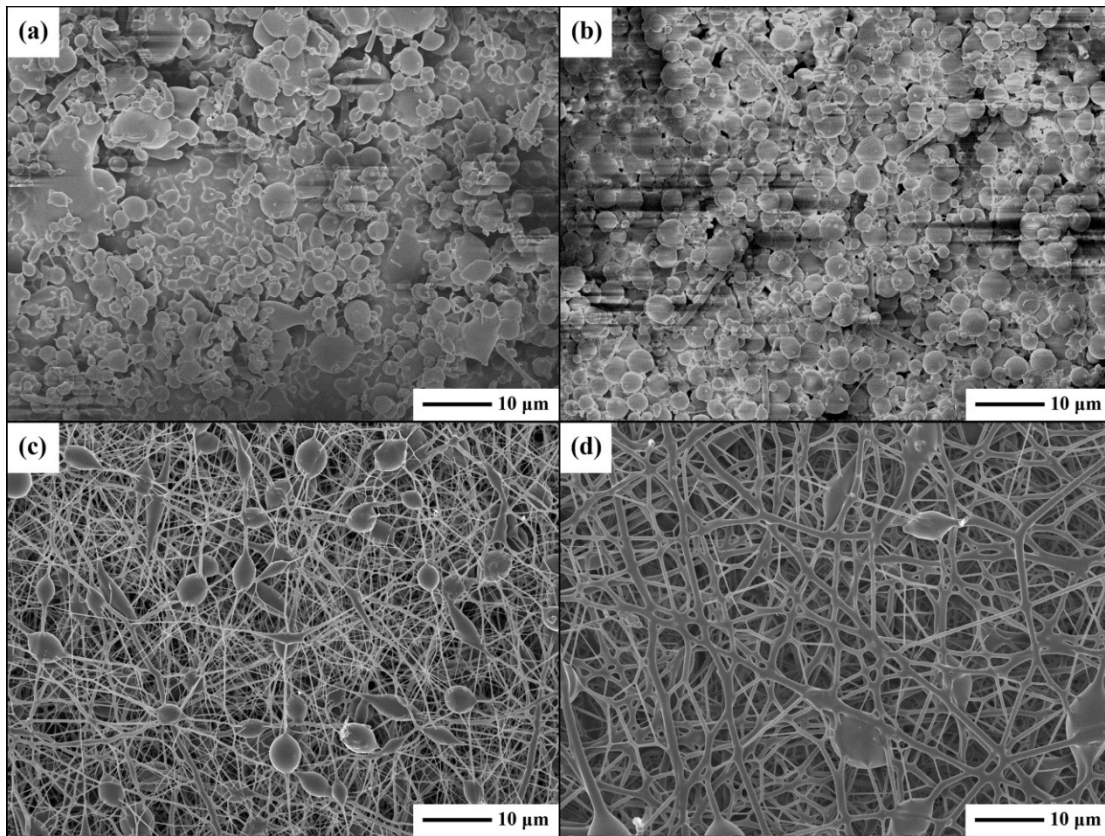

25  
26 **Fig. S3** SEM of sPEG-PLLA-25k nanofiber membranes with different spinning solution  
27 concentrations: (a)  $0.1 \text{ g}\cdot\text{mL}^{-1}$ , (b)  $0.2 \text{ g}\cdot\text{mL}^{-1}$ , (c)  $0.3 \text{ g}\cdot\text{mL}^{-1}$ , (d)  $0.4 \text{ g}\cdot\text{mL}^{-1}$ .  
28

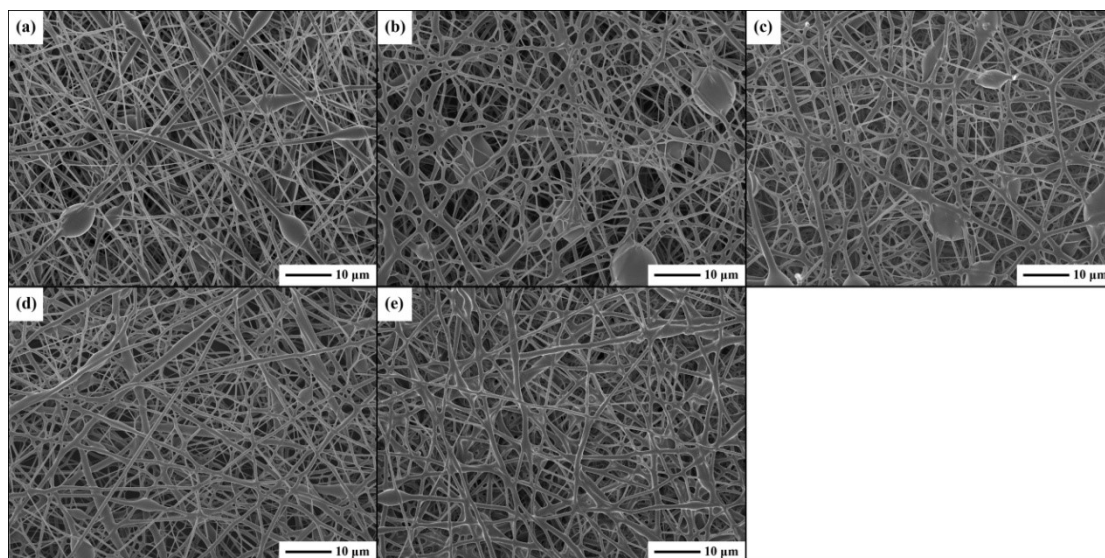

30

31 **Fig. S4** SEM of sPEG-PLLA-25k nanofiber membranes with different spinning voltage: (a) 14  
32 kV, (b) 16 kV, (c) 18 kV, (d) 20 kV, (e) 22 kV.

33

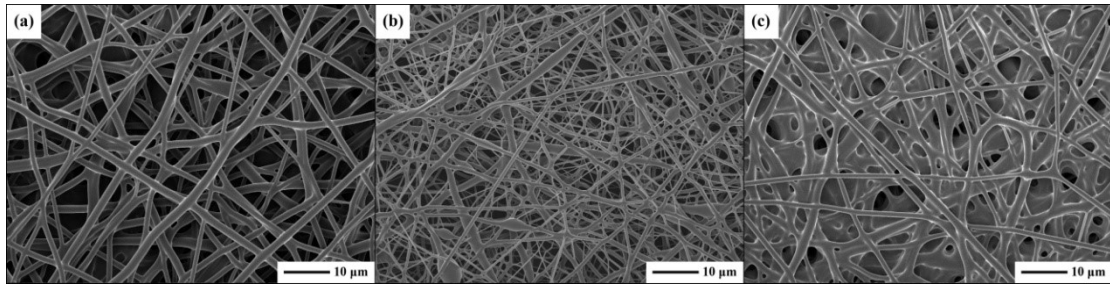

34

35 **Fig. S5** SEM of sPEG-PLLA-25k nanofiber membranes with different spinning speed: (a) 1.5  
36 mL·h<sup>-1</sup>, (b) 2 mL·h<sup>-1</sup>, (c) 2.5 mL·h<sup>-1</sup>.

37

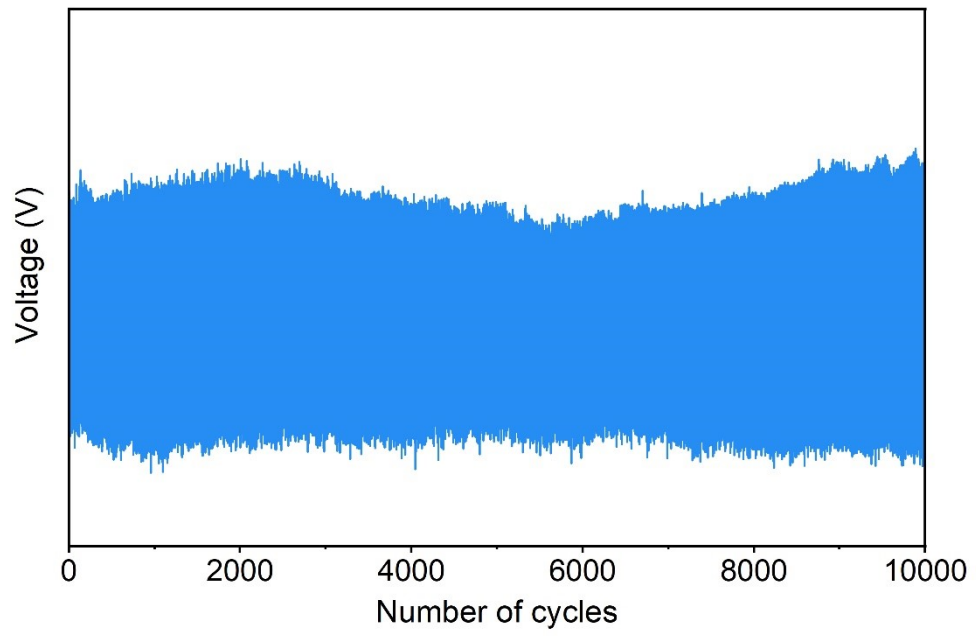

38

39 **Fig. S6** Durability test of sPEG-PLLA-25k nanofiber membrane.

40

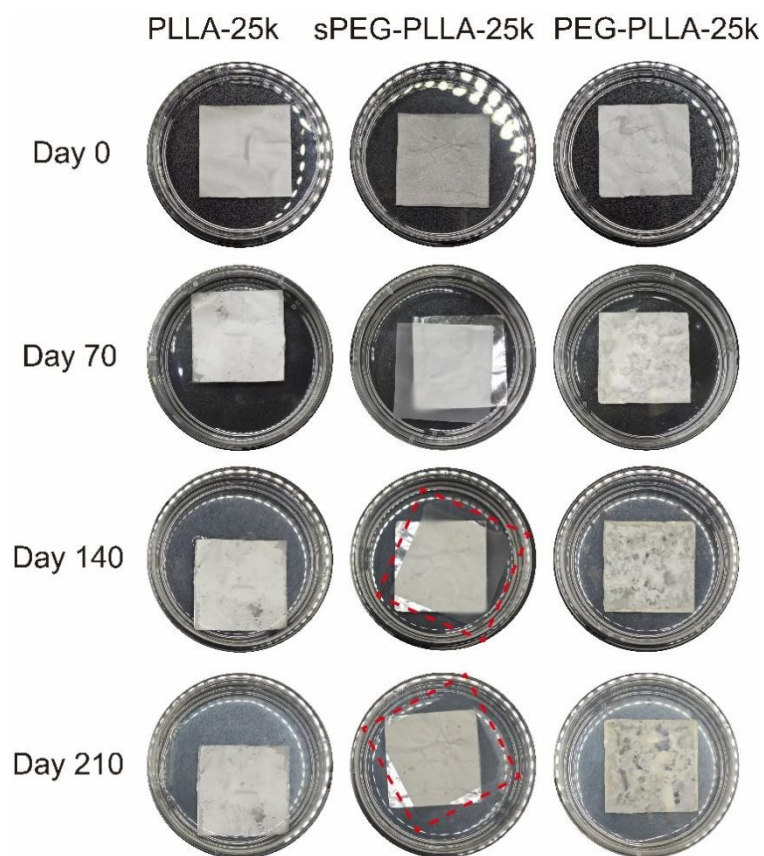

41

42 **Fig. S7** Degradation performance test of nanofiber membranes.

43

44 **Table S1** Representative results of Biomedical piezoelectric materials

| Materials            | Applied Force | Output Voltage | Ref       |
|----------------------|---------------|----------------|-----------|
| PLLA                 | under US      | 0.5 V          | S1        |
| PLLA/VB <sub>2</sub> | bending       | 4.47 V         | S2        |
| PLLA/PDA/MXene       | 1 N           | ~ 0.9 V        | S3        |
| PLLA/BTO             | 30 N          | 3 V            | S4        |
| PLLA/Li-doped ZnO    | under US      | 5.2 V          | S5        |
| P(VDF-TrFE)/TBAC     | 5N            | 1.6 V          | S6        |
| sPEG-PLLA-25k        | 5N            | 9 V            | This work |

45 **Notes:**

46 VB<sub>2</sub>-vitamin B<sub>2</sub>

47 PDA- polydopamine

48 P(VDF-TrFE)-poly(vinylidene fluoride-trifluoroethylene)

49 TBAC-tetrabutylammonium chloride

50

51 **Table S2** DSC data of nanofiber membranes

|                  | Crystallinity ( $X_c$ %) |
|------------------|--------------------------|
| PLLA-25k         | 23.1%                    |
| sPEG-PLLA-25k    | 34.0%                    |
| sPEG-PLLA-105k   | 30.0%                    |
| Sc(sPEG-PLA-25k) | 33.8%                    |
| PEG-PLLA-25k     | 30.6%                    |

52 **Notes:**  $X_c$  was calculated using the following equation:

$$53 \quad X_c = \frac{\Delta H_m - \Delta H_c}{\Delta H_{100\%}} \times 100\%$$

54 where  $X_c$  is the degree of crystallinity,  $\Delta H_m$  is the heat of melting ( $J \cdot g^{-1}$ ) determined from the  
 55 melting peak integral,  $\Delta H_c$  is the heat of cold crystallization ( $J \cdot g^{-1}$ ) determined from the cold  
 56 crystallization peak integral, and  $\Delta H_{100\%}$  is the heat of melting of 100% crystalline material (93.1  
 57  $J \cdot g^{-1}$  for homocrystallites, 142  $J \cdot g^{-1}$  for stereocomplex crystallites).

58

## 59 Supplemental References

- 60 S1 R. Das, T.T. Le, B. Schiff, M.T Chorsi, J. Park, P. Lam, A. Kemerley, A.M. Supran, A.  
61 Eshed and N. Luu, *Biomaterials*, 2023, **301**, 122270.
- 62 S2 Z. Zhang, L.M. Wang, Q. Zhang, H.K. Li, Y. Xiang, X.Y. Wang and X.R. Hu, *Eur.*  
63 *Polym. J.*, 2023, **189**, 111962.
- 64 S3 Y.X. Wu, Q.Q. Yu, X.Y. Zhou, W.X. Ding, X.M. Li, P. Zhou, Y.L. Qiao, Z. Huang, S.J.  
65 Wang, J.A. Zhang, L.Y. Yang, L. Zhang and D.P. Sun, *Int. J. Biol. Macromol.*, 2024, **278**,  
66 134971.
- 67 S4 C. Zhang, W. Song, X. Guo, Z. Li, Y. Kong, J.P. Du, L.H. Hou, Y. Feng, Y.Z. Wang, M.D.  
68 Zhang, L.T. Liang, Y.Y. Huang, J.J. Li, D.Z. Zhu, Q.H. Liu, Y.X. Tan, Z.T. Zhao, Y.T. Zhao,  
69 X.B. Fu and S. Huang, *Biomater. Adv.*, 2025, **167**, 214119.
- 70 S5 X.L. Wang, K. Sun, C. Wang, M.M. Yang, K. Qian, B. Ye, X.D. Guo, Y. Shao, C.L. Chu, F.  
71 Xue, J. Li and J. Bai, *Biomaterials*, 2025, **313**, 122803.
- 72 S6 N. Yang, Y.N. Chen, N.H. Dan, X. Zheng, R.X. Feng, G.F. Yu, X.T. He, W.H. Dan and Y.B.  
73 Wang, *J. Mater. Sci.*, 2022, **57**, 19532-19552.
